# Supplementary material for: Modeling Within-Host Dynamics of Influenza Virus Infection Including Immune Responses
Source: PLoS Comput Biol. 2012 Jun 28;8(6):e1002588. doi: 10.1371/journal.pcbi.1002588 (PMC3386161; doi:10.1371/journal.pcbi.1002588)
Supplement: Table S4 — Comparisons of the best fits using AIC. (PDF) [file pcbi.1002588.s014.pdf]

**Table S4:** Comparisons of the best fits using AIC.

| Pony | RMS<br>Model 1* | AICc**  | RMS<br>model 2* | AICc**  | Number of<br>data points*** |
|------|-----------------|---------|-----------------|---------|-----------------------------|
| 1    | 0.695           | -10.701 | 0.951           | -7.785  | 14                          |
| 2    | 0.651           | -11.740 | 1.061           | -6.762  | 15                          |
| 3    | 0.320           | -19.069 | 0.718           | -10.471 | 14                          |
| 4    | 0.768           | -9.932  | 0.953           | -7.808  | 15                          |
| 5    | 0.618           | -11.486 | 1.027           | -7.121  | 13                          |
| 6    | 0.695           | -10.385 | 0.845           | -8.738  | 13                          |

\* Model 1 is described by Eq. (1). Model 2 is Eq. (1) with  $\kappa=0$ , i.e., there is no killing of infected cells by NK cells.

\*\* Calculated by Eq. (4).

\*\*\* We did not include data points of viral titer under the detection limit after the first undetectable data point.
